# Supplementary material for: Estimation of pack density in grey wolf (Canis lupus) by applying spatially explicit capture-recapture models to camera trap data supported by genetic monitoring
Source: Front Zool. 2018 Oct 3;15:38. doi: 10.1186/s12983-018-0281-x (PMC6171198; doi:10.1186/s12983-018-0281-x)
Supplement: Supplementary file 2 — Individuals identified in the study area during the two sessions of camera trapping in 2014 and 2015. (XLSX 66 kb) [file 12983_2018_281_MOESM1_ESM.xlsx]

## Sheet: Additional file 1
PACK	Individuals wolves Session 2014 (* focal animlas)	Social status	Sex	Individuals wolves Session 2015 (* focal animlas)	Social status	Sex	Distinctive morphologic characters	Tail carriage when urinating	Tail carriage when ground scratching	Tail carriage when defecating	Genotype	Confirming video-scats (N)
PS - Poti South	F1 *	α	Female	F1 *	α	Female	Anomalous color coat with vertical bars, reduced white mask, pale neck, right ear pendant	Markedly c shaped (> 180°)	Markedly c shaped (> 180°)	Diagonal	AP11	yes (2)
PS - Poti South	M1	α	Male	M1	α	Male	Wild type colour coat, pale spots in above orbital region, tail with long hair and clear white patch at the base	Weakly c shaped (< 180°)	Vertical with backwards tip	Arised and flexed	AP37	yes (3)
PS - Poti South	M2	β	Male	M2	β	Male	Wild type colour coat, reduced black streaks on front legs, dark mark in zygomatic region			Weakly c shaped (< 180°)
PS - Poti South	M3	β	Male	M3	β	Male	Almost black coat, vertical black stripe on left hind leg				AP51?	yes (1)
PS - Poti South	F3	β	Female				Dark colour coat, almost absent white mask
PS - Poti South	F4	β	Female				Wild type colour coat, old fractures on the jaw and right front leg				AP43
PS - Poti South	F5	β	Female	F5	β	Female	Dark colour coat, reduced white mask on right side			not evaluable	AP43	yes (1)
PS - Poti South	J1	pup	Unknown				Wild type colour coat
PS - Poti South	J2	pup	Unknown				Wild type colour coat
PS - Poti South	J3	pup	Unknown				Wild type colour coat
PS - Poti South	J4	pup	Unknown				Dark colour coat
PS - Poti South	J5	pup	Unknown				Dark colour coat
PS - Poti South	J6	pup	Unknown				Dark colour coat
PS - Poti South				F	β	Female	Dark colour coat, likely F3
PS - Poti South				Mx	β	Male	Wild type pale colour coat, absent black streaks on front legs
PS - Poti South				My	β	Male	Almost black coat				AP51?	yes (1)
PS - Poti South				Fc	β	Female	Wild type colour coat, absent black streaks on front legs, dark mark in zygomatic region
PS - Poti South				Fd	β	Female	Wild type colour coat, Small size, mangy, reduced black streaks on front legs, concurrent capture with Fc
MF - Monte Favalto	M7 *	α	Male				Wild type colour coat	Markedly c shaped (> 180°)	Markedly c shaped (> 180°)	Horizontal	AP34	yes (1)
MF - Monte Favalto	F8	α	Female				Wild type colour coat, tail with long hairs	Weakly c shaped (< 180°)	Weakly c shaped (< 180°)	Almost horizontal	AP40	yes (1)
MF - Monte Favalto	F9	β	Female				Wild type colour coat
MF - Monte Favalto	F10	β	Female				Wild type colour coat
MF - Monte Favalto				F9/10	α	Female	Wild type colour coat	Weakly c shaped (< 180°)	Weakly c shaped (< 180°)	Almost horizontal downwards tip	MF05	yes (1)
MF - Monte Favalto				M22 *	α	Male	Wild type colour coat, thin pointed tail	Weakly c shaped (< 180°)	Diagonal with backwards tip	Arised and flexed	MF03	yes (3)
MF - Monte Favalto				M27	β	Male	Wild type colour coat, clear patch on the shoulders	Not fully raised or lateral	Diagonal	Horizontal	MF04	yes (2)
MF - Monte Favalto				M28	β	Male	Wild type colour coat
PNE - Poti North East	M5	α	Male				Almost black colour coat	Weakly c shaped (< 180°)	Almost horizontal	no case
PNE - Poti North East	F6 *	α	Female	F6 *	α	Female	Wild type colour coat but without black streaks on front legs, white socks, large white mask, white spots on above orbital region	double raised legs when urinating	Weakly c shaped (< 180°)	not evaluable	AP36
PNE - Poti North East	J7	pup	Unknown				Wild type colour coat
PNE - Poti North East				M23	α	Male	Wild type colour coat, brushy tail	Markedly c shaped (> 180°)	Weakly c shaped (< 180°)	no case
PN - Poti North	M6 *	α	Male	M6 *	α	Male	Very large body size, black colour coat with white mask and feet, left ear pendant	Curled	Curled	no case	AP14
PN - Poti North	F7	α	Female	F7	α	Female	Pale colour coat, almost absent black streaks on front legs, thin pointed tail	Half normal shaped	Half normal shaped	Almost horizontal flexed	AP05
PN - Poti North	J8	pup	Unknown				Wild type colour coat
PN - Poti North	J9	pup	Unknown				Wild type colour coat
PN - Poti North				M34	β	Male	Large male, wild type colour coat, absent black streaks on front legs, large white mask
PN - Poti North				M35	β	Male	Wild type colour coat, black streaks on front leg
LG - Monte Lignano	M4	α	Male	M4	α	Male	Wild type colour coat, pointed tail	Diagonal	no case	no case
LG - Monte Lignano	F12	α	Female	F12	α	Female	Wild type colour coat	Half normal shaped	no case	no case
LG - Monte Lignano	F11 *	β	Female	F11 *	β	Female	Wild type colour coat, marked black streaks on front legs, left hind leg with old fracture	Standing when urinating	no case	Almost horizontal flexed
LG - Monte Lignano				LG1	β	Unknown	Wild type colour coat
LG - Monte Lignano				LG2	β	Unknown	Wild type colour coat
VC - Val di Chio	M8 *	α	Male	M8 *	α	Male	Wild type colour coat, large neck, short tail with an old fracture on the tip	Straight and Lateral	diagonal with downward tip	no case
VC - Val di Chio	F13	α	Female	F13	α	Female	Wild type colour coat, long tail	markedly c /half normal shaped	Vertical with backwards tip	no case
VC - Val di Chio	F15	β	Female	F15	β	Female	Wild type colour coat, pale neck, white spots on above orbital region
VC - Val di Chio	M9	β	Male				Mangy thin tail
VC - Val di Chio	M10	β	Male				Wild type colour coat
VC - Val di Chio	F14	β	Female				Wild type colour coat
VC - Val di Chio	VC1	β	Unknown				Wild type colour coat
VC - Val di Chio				IND	β	Unknown	Wild type colour coat
VC - Val di Chio				IND	β	Unknown	Wild type colour coat
VC - Val di Chio				IND	β	Unknown	Wild type colour coat
CS - Catenaia South	M14 *	α	Male				Very large body mass, right eye blind, neck with dark collar, thick tail at the root, with long hairs and then pointed	Markedly c shaped (> 180°)	diagonal with backwards tip	no case	AC37
CS - Catenaia South	F17	α	Female				Wild type pale colour coat, short tail, thick at the root	Weakly c shaped (< 180°)	vertical	no case	AC41
CN - Catenaia North	M15 *	α	Male	M15 *	α	Male	Wild type colour coat with dark back, contrasting white mask, dark brushy tail with long hairs, declaws on each hind leg	Weakly c shaped (< 180°)	diagonal	Diagonal	AC55	yes (1)
CN - Catenaia North	F18	α	Female	F18	α	Female	Wild type colour coat, thin tail, white anal patch	Weakly c shaped (< 180°)	vertical	Almost horizontal flexed	AC60	yes (1)
CN - Catenaia North				F28	β	Female	Wild type colour coat, thick tail at the root, declaws on each hind leg
CN - Catenaia North				M36	β	Male	Wild type colour coat, declaws on each hind leg
CN - Catenaia North				M37	β	Male	Wild type colour coat, without declaws
VE - Vallesanta East	M17	α	Male	M17	α	Male	Wild type pale colour coat, tail thin at the root	diagonal	diagonal	Arised and flexed
VE - Vallesanta East	F20 *	α	Female	F20 *	α	Female	Wild type dark colour coat, black tail with long hairs, white anal patch	Weackly c shaped horizontal	half normal shaped	Almost horizontal
AT - Alto Tevere	M19	α	Male	M19	α	Male	Wild type colour coat	Weakly c shaped (< 180°)	vertical	Almost horizontal flexed
AT - Alto Tevere	F21 *	α	Female	F21 *	α	Female	Wild type colour coat, tail fractured in the middle	Diagonal with half pendant	Diagonal with half pendant	no case
AT - Alto Tevere	BC1	β	Unknown				Wild type colour coat
FU - Monte Fungaia				M30	α	Male	Wild type colour coat	no case	no case	no case
FU - Monte Fungaia				F26 *	α	Female	Wild type colour coat, pregnant and then lactating, wound on his back, different from F6 and F21	no case	no case	no case
TR - Tramignone				M25 *	α	Male	Wild type colour coat	diagonal and lateral	flexed in the middle	Arised and flexed
TR - Tramignone				F24	α	Female	Wild type colour coat, thick at the root tail with long hairs, lactating female	no case	only one case	no case
TR - Tramignone				M32	β	Male	Large male, wild type dark colour coat with marked black streaks on front legs
TR - Tramignone				M33	β	Male	Wild type colour coat
TR - Tramignone				F27	β	Female	Wild type colour coat
TR - Tramignone				TRJK	β	Unknown	Anomalous, very short tail
VW - Vallesanta West				M26 *	α	Male	Wild type colour coat, mangy, partially stripped tail, flat ears	Weakly c shaped (< 180°)	diagonal	no case
VW - Vallesanta West				F25	α	Female	Wild type colour coat	half normal shaped	almost horizontal	Horizontal
PN Poti north pack				AP57	α	Male	Wild type colour coat with dark back, large neck, reduced black streaks on front legs,	diagonal, sometimes almost horizontal	diagonal	Almost horizontal flexed	AP57	yes (1)
